# Supplementary material for: Block Copolymer Micelles Encapsulating Au(III) Bis(Dithiolene) Complexes as Promising Nanostructures with Antiplasmodial Activity
Source: MDPI journal article supplement (doi:10.3390/pharmaceutics15031030), 2023-03-22
Supplement: s1 [file s1]

# Block Copolymer Micelles Encapsulating Au(III) Bis(dithiolene) Complexes as Promising Nanostructures with Antiplasmodial Activity

Joana F. Santos <sup>1</sup>, Raquel Azevedo <sup>2</sup>, Miguel Prudêncio <sup>2</sup>, Fernanda Marques <sup>1,3</sup>, Yann Le Gal <sup>4</sup>, Dominique Lorcy <sup>4</sup>, Célia Fernandes <sup>1,3\*</sup>

<sup>1</sup> Centro de Ciências e Tecnologias Nucleares, Instituto Superior Técnico, Universidade de Lisboa, Estrada Nacional 10, km 139.7, 2695-066 Bobadela LRS, Portugal

<sup>2</sup> Instituto de Medicina Molecular João Lobo Antunes, Faculdade de Medicina, Universidade de Lisboa, Av. Prof. Egas Moniz, 1649-028 Lisboa, Portugal

<sup>3</sup> Departamento de Engenharia e Ciências Nucleares, Instituto Superior Técnico, Universidade de Lisboa, Estrada Nacional 10, km 139.7, 2695-066 Bobadela LRS, Portugal

<sup>4</sup> Institut des Sciences Chimiques de Rennes-UMR 6226, Université de Rennes, CNRS, ISCR, F-35000 Rennes, France

## Table of Contents

Figure S1.

2

PQ, AuSe and AuS were dissolved in DMF, to afford 2.0 g L<sup>-1</sup> solutions. These solutions were diluted to prepare serial concentrations corresponding to 0.01 – 0.06 mg mL<sup>-1</sup>, in the case of PQ, and 0.001 – 0.02 mg mL<sup>-1</sup>, in the case of AuSe and AuS. The solutions were analyzed by UV-Vis spectrophotometry and the calibration curves were established.

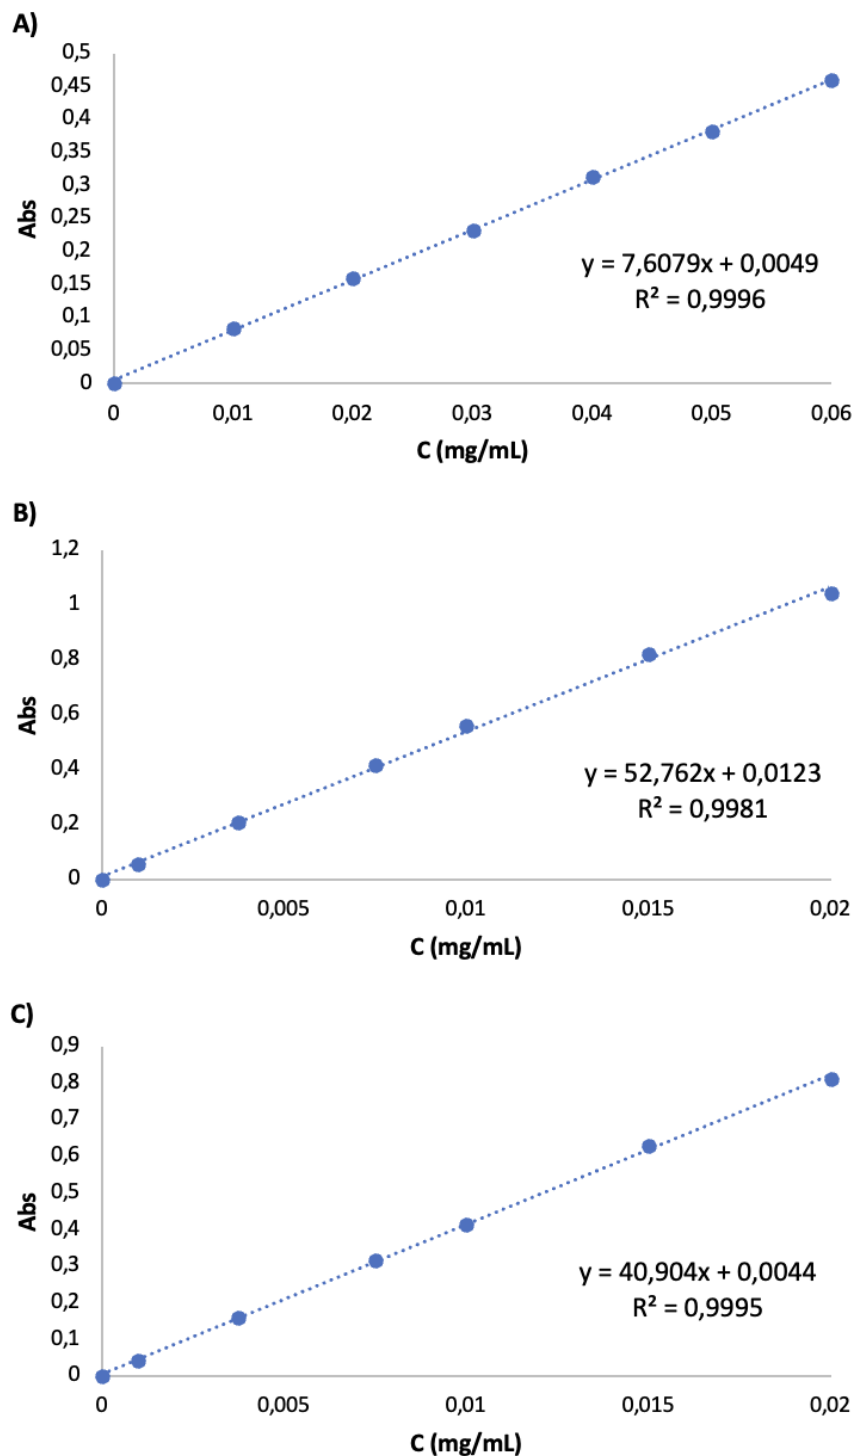

**Figure S1.** Calibration curves of **A)** PQ at  $\lambda = 364$  nm; **B)** AuSe at  $\lambda = 393$  nm and **C)** AuS at  $\lambda = 364$  nm.
